# Supplementary material for: The Binding of BF-227-Like Benzoxazoles to Human α-Synuclein and Amyloid β Peptide Fibrils
Source: PubMed Central journal article supplement (PMC6144582; doi:10.1177/1536012118796297), 2018-09-14
Supplement: Supplementary_Data.pdf [file Supplementary_Data.pdf]

## Supplementary Data

Title: The Binding of BF-227 and BF-227-like Benzoxazoles to Alpha-synuclein and Amyloid Beta Peptide Fibrils

Analysis of [<sup>3</sup>H]BF-227 binding to human  $\alpha$ -Syn and A $\beta$ <sub>1-42</sub> fibrils. Values are expressed as means  $\pm$  SD.

| Table S1: K <sub>D</sub> and B <sub>max</sub> for [ <sup>3</sup> H]BF-227 binding to $\alpha$ -Syn and A $\beta$ <sub>1-42</sub> fibrils |                     |                              |                          |                                   |
|------------------------------------------------------------------------------------------------------------------------------------------|---------------------|------------------------------|--------------------------|-----------------------------------|
| Fibril                                                                                                                                   | K <sub>D</sub> (nM) | B <sub>max</sub> (pmol/nmol) | Mean K <sub>D</sub> (nM) | Mean B <sub>max</sub> (pmol/nmol) |
| $\alpha$ -Syn                                                                                                                            | 47.7                | 13.5                         | 46.0 $\pm$ 2.8           | 12.7 $\pm$ 1.1                    |
|                                                                                                                                          | 43.8                | 12.0                         |                          |                                   |
| A $\beta$                                                                                                                                | 18.5                | 20.7                         | 15.7 $\pm$ 3.1           | 19.4 $\pm$ 2.7                    |
|                                                                                                                                          | 13.2                | 16.3                         |                          |                                   |
|                                                                                                                                          | 15.4                | 21.3                         |                          |                                   |
